# Supplementary material
Source: publisher site journal article supplement (https://www.spandidos-publications.com/8167/downloadSupplementary)
Supplement: Supplementary file 1 [file downloadSupplementary]

## Sheet: upregulated KEGG
upregulated KEGG analysis
ID	Description	GeneRatio	BgRatio	pvalue	p.adjust	qvalue	geneID	Count	a1	a2	a3	b	fold_enrichment
hsa04933	AGE-RAGE signaling pathway in diabetic complications	21/530	11/809	6.42e-06	0.00142725	0.00126347	581/1027/1277/1278/1281/1729/2335/3383/3845/4772/50507/8503/23236/113026/5336/5579/5590/4089/6777/7046/7424	21	21	99	0.212121	0.0727922	2.91407
hsa03010	Ribosome	27/530	154/7281	1.44e-05	0.00142725	0.00126347	55173/64969/23521/6142/6164/6165/6168/6170/6125/6130/6132/6175/6176/6181/6205/6206/6208/6217/6223/6224/6227/6191/6193/6194/6202/6203/7311	27	27	154	0.175325	0.0727922	2.40856
hsa04510	Focal adhesion	16/265	199/7281	1.51e-05	0.00142725	0.00126347	60/330/1277/1278/1291/1292/1399/1499/1729/1793/2064/2316/2317/2335/2932/3691/10398/55742/8503/23396/4659/54776/5579/5747/2889/25759/53358/7057/7058/3371/7424/7450	32	32	199	0.160804	0.0727922	2.20908
hsa05165	Human papillomavirus infection	43/530	317/7281	4.39e-05	0.00310285	0.00274681	8312/581/1027/1277/1278/1291/1292/64764/9586/1499/1978/2335/2932/8841/10014/10013/51564/9734/3691/3845/9223/9794/84441/55534/2475/4799/8503/5315/5584/5590/5747/3516/23513/6908/6934/7057/7058/3371/7249/7297/23352/7450/81029	43	43	317	0.135647	0.0727922	1.86348
hsa04012	ErbB signaling pathway	17/530	86/7281	0.000123634	0.00680956	0.00602817	23624/1027/1399/1978/2064/2065/2932/3845/2475/3084/8503/5336/5579/5747/25759/53358/6777	17	17	86	0.197674	0.0727922	2.7156
hsa01521	EGFR tyrosine kinase inhibitor resistance	8/265	79/7281	0.000144372	0.00680956	0.00602817	558/581/1978/2064/2065/2263/2932/3845/2475/3084/8503/5336/5579/6194/25759/53358	16	16	79	0.202532	0.0727922	2.78233
hsa03013	RNA transport	13/265	19/809	0.000242569	0.00980673	0.00868143	8086/22794/23191/1968/8665/1973/1975/1978/1979/8672/25929/3837/9631/23511/91181/8021/9688/26986/9883/5905/84220/6396/10073/7175/7514/57510	26	26	171	0.152047	0.0727922	2.08878
hsa04360	Axon guidance	13/265	175/7281	0.000352374	0.0124652	0.0110349	3983/22885/659/1969/2048/2050/2932/3845/3984/8503/5336/5361/23654/5365/5530/5533/5590/5747/6091/6092/9353/6586/57522/85464/137970/81029	26	26	175	0.148571	0.0727922	2.04104
hsa04810	Regulation of actin cytoskeleton	14/265	212/7281	0.00143229	0.0441449	0.0390794	60/1399/23191/1729/1793/2245/2259/2260/2263/2335/3684/3687/3689/3691/3845/3984/4627/10398/10787/8503/8394/23396/4659/54776/5747/6548/221178/85464	28	28	212	0.132075	0.0727922	1.81442
hsa05205	Proteoglycans in cancer	27/530	203/7281	0.00155989	0.0441449	0.0390794	60/23624/960/1499/1655/1975/2064/2065/2260/2316/2317/2335/3339/3708/3845/4318/2475/8503/5336/4659/54776/5579/5747/6194/6548/7057/81029	27	27	203	0.133005	0.0727922	1.82719

## Sheet: downregulated KEGG
Table SV. Downregulated KEGG analysis.
ID	Description	GeneRatio	BgRatio	P-value	p.adjust	qvalue	geneID	Count	a1	a2	a3	b	fold_enrichment
hsa04120	Ubiquitin mediated proteolysis	31/417	7/372	2.02e-11	5.24e-09	4.09e-09	329/57448/672/8945/996/8453/1642/55120/8925/26091/10075/83737/4214/4193/8554/23759/64326/6500/9320/10054/7322/140739/7326/7328/7329/3093/7332/92912/7337/9690/51366	31	31	137	0.226277	0.0572724	3.9509
hsa04110	Cell cycle	8/139	7/411	1.02e-07	9.76e-06	7.62e-06	472/701/891/9134/8556/995/996/1387/2033/2932/4193/5000/5001/5933/5934/6500/4087/4089/8243/10735/7027/7029/7040/7531	24	24	124	0.193548	0.0572724	3.37944
hsa00310	Lysine degradation	16/417	5/617	1.13e-07	9.76e-06	7.62e-06	55870/79823/84444/2145/2146/58508/55904/64324/4967/5352/7799/29072/84193/79723/7468/54904	16	16	59	0.271186	0.0572724	4.73503
hsa04068	FoxO signaling pathway	23/417	6/331	1.33e-06	8.62e-05	6.73e-05	208/10000/472/673/891/1387/2033/26260/2309/5594/5599/5601/4193/51701/5728/5934/4087/4089/6648/6655/6794/6789/7040	23	23	132	0.174242	0.0572724	3.04235
hsa03013	RNA transport	25/417	19/809	1.23e-05	0.000586786	0.000457887	1207/8894/8662/1974/9669/8087/57122/9972/129401/10762/53371/4927/4928/11097/5411/9883/100101267/5903/285190/84220/51095/7329/26019/7514/57510	25	25	171	0.146199	0.0572724	2.55269
hsa05211	Renal cell carcinoma	14/417	1/112	1.36e-05	0.000586786	0.000457887	208/10000/673/1387/8453/2033/2113/3091/5594/5062/5781/5879/6655/7040	14	14	65	0.215385	0.0572724	3.76071
hsa05210	Colorectal cancer	13/417	3/364	2.58e-05	0.000900003	0.000702299	208/10000/324/673/2932/5594/5599/5601/4437/5879/4087/4089/7040	13	13	60	0.216667	0.0572724	3.78309
hsa04919	Thyroid hormone signaling pathway	19/417	13/816	2.78e-05	0.000900003	0.000702299	208/10000/1387/2033/2932/3091/5594/4193/5469/116931/9969/23389/8648/10499/5567/5578/5579/6009/25942	19	19	116	0.163793	0.0572724	2.8599
hsa04140	Autophagy - animal	20/417	17/967	3.48e-05	0.00100182	0.000781751	208/10000/64422/9474/8837/3091/5594/5599/5601/8897/5289/5567/5728/9821/6009/6794/55014/55578/81671/55062	20	20	128	0.15625	0.0572724	2.72819
hsa04010	MAPK signaling pathway	31/417	9/257	5.03e-05	0.00130225	0.00101618	208/10000/1386/673/2005/2316/6416/4214/10746/4217/8491/5594/5599/5601/4775/51701/5062/5495/5567/5578/5579/5879/9693/5922/10125/6655/6788/6789/57551/51347/7040	31	31	255	0.121569	0.0572724	2.12264
hsa05213	Endometrial cancer	11/417	5/728	9.34e-05	0.00219851	0.00171556	208/10000/324/673/999/1495/2309/2932/5594/5728/6655	11	11	50	0.22	0.0572724	3.84129
hsa03018	RNA degradation	14/417	3/280	0.000115115	0.00230658	0.00179989	23019/25904/57472/246175/167227/1656/51013/5394/255967/5073/219988/54464/22803/84186	14	14	78	0.179487	0.0572724	3.13392
hsa04218	Cellular senescence	22/417	9/407	0.000115774	0.00230658	0.00179989	208/10000/472/8945/891/9134/2113/2309/10114/132660/5594/4193/4605/4775/5728/5933/5934/6009/4087/7040/54822/7417	22	22	161	0.136646	0.0572724	2.3859
hsa04141	Protein processing in endoplasmic reticulum	22/417	7/307	0.000182254	0.0033717	0.00263104	22926/821/79139/80331/27102/10905/4217/5599/5601/4780/2923/5887/10427/22872/11231/6500/201595/7322/7326/29979/56886/55757	22	22	166	0.13253	0.0572724	2.31403
hsa05166	HTLV-I infection	29/417	9/257	0.000284538	0.00491303	0.00383378	208/10000/324/1386/472/701/821/996/1387/1739/2005/2033/2113/2932/3683/6416/4214/5599/4605/4775/5427/5567/4087/4089/7040/83660/8295/7417/7514	29	29	255	0.113725	0.0572724	1.9857
hsa04144	Endocytosis	29/417	46753	0.000395261	0.00639829	0.00499277	23527/1173/116985/50807/829/832/51510/9829/8411/22905/2060/253725/83737/4193/10015/5868/5878/80230/4087/6642/27131/58533/51324/8027/7037/7040/9101/51028/137492	29	29	260	0.111538	0.0572724	1.94751
hsa04914	Progesterone-mediated oocyte maturation	5/139	11/809	0.000462987	0.00666186	0.00519845	208/10000/6790/673/891/995/996/64506/80315/5594/5599/5601/5140/5567/6793	15	15	99	0.151515	0.0572724	2.64552
hsa05231	Choline metabolism in cancer	5/139	11/809	0.000462987	0.00666186	0.00519845	208/10000/56994/8527/8526/3091/5594/5599/5601/5578/5579/5879/6009/57153/6655	15	15	99	0.151515	0.0572724	2.64552
hsa05212	Pancreatic cancer	11/417	4/455	0.000900674	0.0122776	0.00958058	208/10000/673/5594/5599/5601/5879/10928/4087/4089/7040	11	11	64	0.171875	0.0572724	3.00101
hsa05200	Pathways in cancer	38/417	30/553	0.00101878	0.0130586	0.01019	208/10000/324/23365/329/673/9134/999/1387/1495/8453/2033/2113/2776/2782/59345/2932/3091/5594/5599/5601/4193/4437/5567/5578/5579/5728/5747/5879/10928/10125/9475/862/4087/4089/6655/6789/7040	38	38	395	0.096203	0.0572724	1.67974
hsa04071	Sphingolipid signaling pathway	16/417	10/617	0.0010588	0.0130586	0.01019	340485/208/10000/2776/4217/5594/5599/5601/28227/5527/5578/5579/5728/5879/9475/259230	16	16	118	0.135593	0.0572724	2.36752
hsa04012	ErbB signaling pathway	13/417	3/254	0.0011172	0.0131525	0.0102633	208/10000/673/2932/6416/5594/5599/5601/5062/5578/5579/5747/6655	13	13	86	0.151163	0.0572724	2.63937
hsa05161	Hepatitis B	6/139	16/809	0.00138374	0.0155821	0.0121592	208/10000/1386/9134/1387/1642/2033/6416/4214/5594/5599/5601/4775/5578/5579/5728/4089/7040	18	18	144	0.125	0.0572724	2.18255
hsa03015	mRNA surveillance pathway	13/417	29221	0.00189741	0.0204762	0.0159782	53981/11052/1479/81608/8106/10914/64895/5411/28227/5527/23049/8189/26019	13	13	91	0.142857	0.0572724	2.49435
hsa05164	Influenza A	20/417	23/968	0.0020166	0.020892	0.0163027	3267/208/10000/1386/1387/27102/2033/2932/11100/3460/6416/5594/5599/5601/4928/8106/5578/5579/7706/7514	20	20	173	0.115607	0.0572724	2.01855
hsa04520	Adherens junction	11/417	8/809	0.00242467	0.0241534	0.0188476	81/999/1387/1495/2033/9855/5594/51701/5879/4087/4089	11	11	72	0.152778	0.0572724	2.66757
hsa04014	Ras signaling pathway	8/139	27/866	0.00255854	0.0245431	0.0191517	208/10000/8315/2113/55770/2782/59345/5594/5599/5601/5062/5567/5578/5579/5781/5868/5878/5879/10928/5922/10125/5966/6655/6789	24	24	227	0.105727	0.0572724	1.84604
hsa04722	Neurotrophin signaling pathway	5/139	11/673	0.00311989	0.0285035	0.0222421	208/10000/673/2309/2932/57498/4214/4217/5594/5599/5601/5781/5879/6655/7531	15	15	119	0.12605	0.0572724	2.20089
hsa04310	Wnt signaling pathway	17/417	12/611	0.00319151	0.0285035	0.0222421	324/8945/1387/23002/2033/2932/5599/5601/4775/51701/5567/5578/5579/5879/9475/6500/4089	17	17	143	0.118881	0.0572724	2.07572
hsa03460	Fanconi anemia pathway	3/139	5/662	0.00367926	0.0315132	0.0245906	100526739/672/83990/55215/55120/5395/51455/6117/7398	9	9	55	0.163636	0.0572724	2.85716
hsa03030	DNA replication	7/417	4/809	0.00377185	0.0315132	0.0245906	1763/5422/5427/5557/5981/5982/6117	7	7	36	0.194444	0.0572724	3.39508
hsa04320	Dorso-ventral axis formation	2/139	1/260	0.00436363	0.0353181	0.0275597	673/64506/80315/2113/5594/6655	6	6	28	0.214286	0.0572724	3.74152
hsa04114	Oocyte meiosis	5/139	7/411	0.00463107	0.036068	0.0281449	6790/8945/891/9134/995/996/64506/80315/5594/5527/5567/6500/9748/8243/7531	15	15	124	0.120968	0.0572724	2.11215
hsa03420	Nucleotide excision repair	8/417	1/155	0.00473479	0.036068	0.0281449	1642/2074/730394/5427/5887/5981/5982/6117	8	8	47	0.170213	0.0572724	2.97199
hsa05223	Non-small cell lung cancer	3/139	2/251	0.00529598	0.0391902	0.0305813	208/10000/673/2309/5594/5578/5579/6655/6789	9	9	58	0.155172	0.0572724	2.70938
hsa05205	Proteoglycans in cancer	7/139	15/538	0.00596697	0.042929	0.0334988	208/10000/23365/673/960/29102/2316/3091/5594/4193/5567/5578/5579/5747/5781/5879/5962/9475/4087/6655/7040	21	21	203	0.103448	0.0572724	1.80625
